# Supplementary material for: Theoretical Proposals for possible Hydrolytic and Photoinitiated Degradation pathways for Cyazofamid and Cymoxanil: Implications in Food Safety
Source: Research Square preprint supplement (doi:10.21203/rs.3.rs-7078262/v1), 2025-07-31
Supplement: Supplementary file 1 [file 67b690050240badc89505207.docx]

**Theoretical Proposals for possible Hydrolytic and Photoinitiated Degradation pathways for Cyazofamid and Cymoxanil: Implications in Food Safety**

***Peter N. Nelsona, Willem H. Muldera, Wayne Myrieb**

aDepartment of Chemistry, The University of the West Indies, Mona Campus, Kingston 7, St. Andrew, Jamaica

bCoconut Industry Board, 18 Waterloo Road, Kingston 10, St. Andrew, Jamaica

**Supporting Information**

Contents

[**1** **S1 Calculated bonding parameters** 3](#_Toc168680899)

[**2** **S2: Absolute energy values** 7](#_Toc168680900)

# **S1 Calculated bonding parameters**


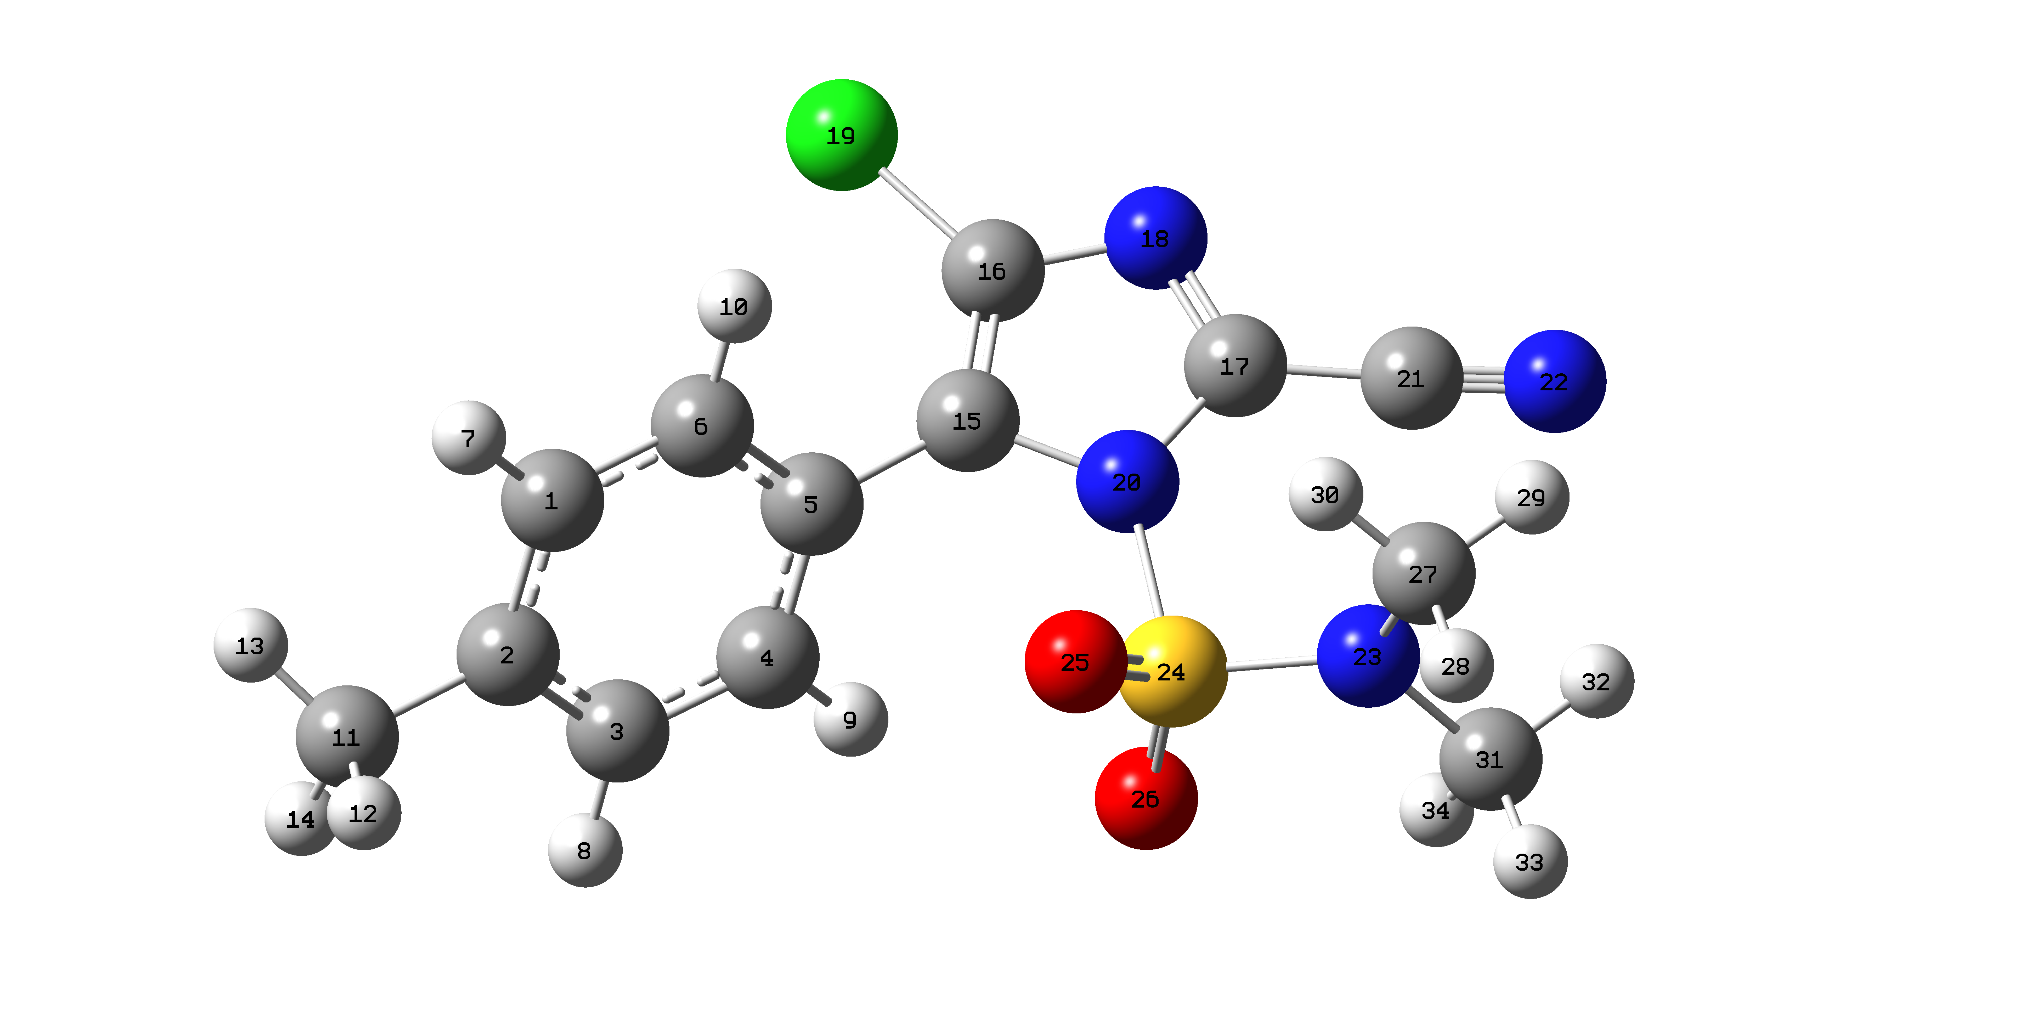


**Table 1**. Calculated bond lengths and angles for cyazofamid.

| Bond | Length/ Å | Angle | Angle/ o | Angle | Angle/ o |
| --- | --- | --- | --- | --- | --- |
| R(1,2) | 1.393 | A(2,1,6) | 121.0831 | A(15,20,24) | 124.1054 |
| R(1,6) | 1.3844 | A(2,1,7) | 119.5552 | A(17,20,24) | 129.3416 |
| R(1,7) | 1.0843 | A(6,1,7) | 119.3616 | A(24,23,27) | 119.8204 |
| R(2,3) | 1.3922 | A(1,2,3) | 118.1308 | A(24,23,31) | 121.2817 |
| R(2,11) | 1.504 | A(1,2,11) | 120.8944 | A(27,23,31) | 116.8919 |
| R(3,4) | 1.3854 | A(3,2,11) | 120.9665 | A(20,24,23) | 102.8281 |
| R(3,8) | 1.0843 | A(2,3,4) | 121.2358 | A(20,24,25) | 103.4026 |
| R(4,5) | 1.3928 | A(2,3,8) | 119.5307 | A(20,24,26) | 105.3403 |
| R(4,9) | 1.0825 | A(4,3,8) | 119.2329 | A(23,24,25) | 110.8979 |
| R(5,6) | 1.3926 | A(3,4,5) | 120.1815 | A(23,24,26) | 109.3564 |
| R(5,15) | 1.4711 | A(3,4,9) | 119.7629 | A(25,24,26) | 122.7938 |
| R(6,10) | 1.083 | A(5,4,9) | 120.0556 | A(23,27,28) | 110.3538 |
| R(11,12) | 1.0937 | A(4,5,6) | 118.9957 | A(23,27,29) | 108.3304 |
| R(11,13) | 1.0911 | A(4,5,15) | 121.3825 | A(23,27,30) | 110.468 |
| R(11,14) | 1.0909 | A(6,5,15) | 119.5699 | A(28,27,29) | 109.9579 |
| R(15,16) | 1.3735 | A(1,6,5) | 120.3679 | A(28,27,30) | 108.5748 |
| R(15,20) | 1.3888 | A(1,6,10) | 119.9498 | A(29,27,30) | 109.1442 |
| R(16,18) | 1.3479 | A(5,6,10) | 119.6822 | A(23,31,32) | 108.407 |
| R(16,19) | 1.7184 | A(2,11,12) | 110.6566 | A(23,31,33) | 109.867 |
| R(17,18) | 1.3088 | A(2,11,13) | 111.3708 | A(23,31,34) | 110.0697 |
| R(17,20) | 1.3794 | A(2,11,14) | 111.3585 | A(32,31,33) | 110.2324 |
| R(17,21) | 1.4213 | A(12,11,13) | 107.5184 | A(32,31,34) | 109.2085 |
| R(20,24) | 1.7659 | A(12,11,14) | 107.534 | A(33,31,34) | 109.045 |
| R(21,22) | 1.1486 | A(13,11,14) | 108.2331 |  |  |
| R(23,24) | 1.6117 | A(5,15,16) | 129.9701 |  |  |
| R(23,27) | 1.464 | A(5,15,20) | 126.0415 |  |  |
| R(23,31) | 1.4654 | A(16,15,20) | 103.9796 |  |  |
| R(24,25) | 1.4366 | A(15,16,18) | 112.3858 |  |  |
| R(24,26) | 1.4388 | A(15,16,19) | 126.4997 |  |  |
| R(27,28) | 1.0923 | A(18,16,19) | 121.1054 |  |  |
| R(27,29) | 1.0901 | A(18,17,20) | 111.6738 |  |  |
| R(27,30) | 1.0873 | A(18,17,21) | 122.481 |  |  |
| R(31,32) | 1.0898 | A(20,17,21) | 125.8451 |  |  |
| R(31,33) | 1.0924 | A(16,18,17) | 105.4081 |  |  |
| R(31,34) | 1.0860 | A(15,20,17) | 106.5488 |  |  |


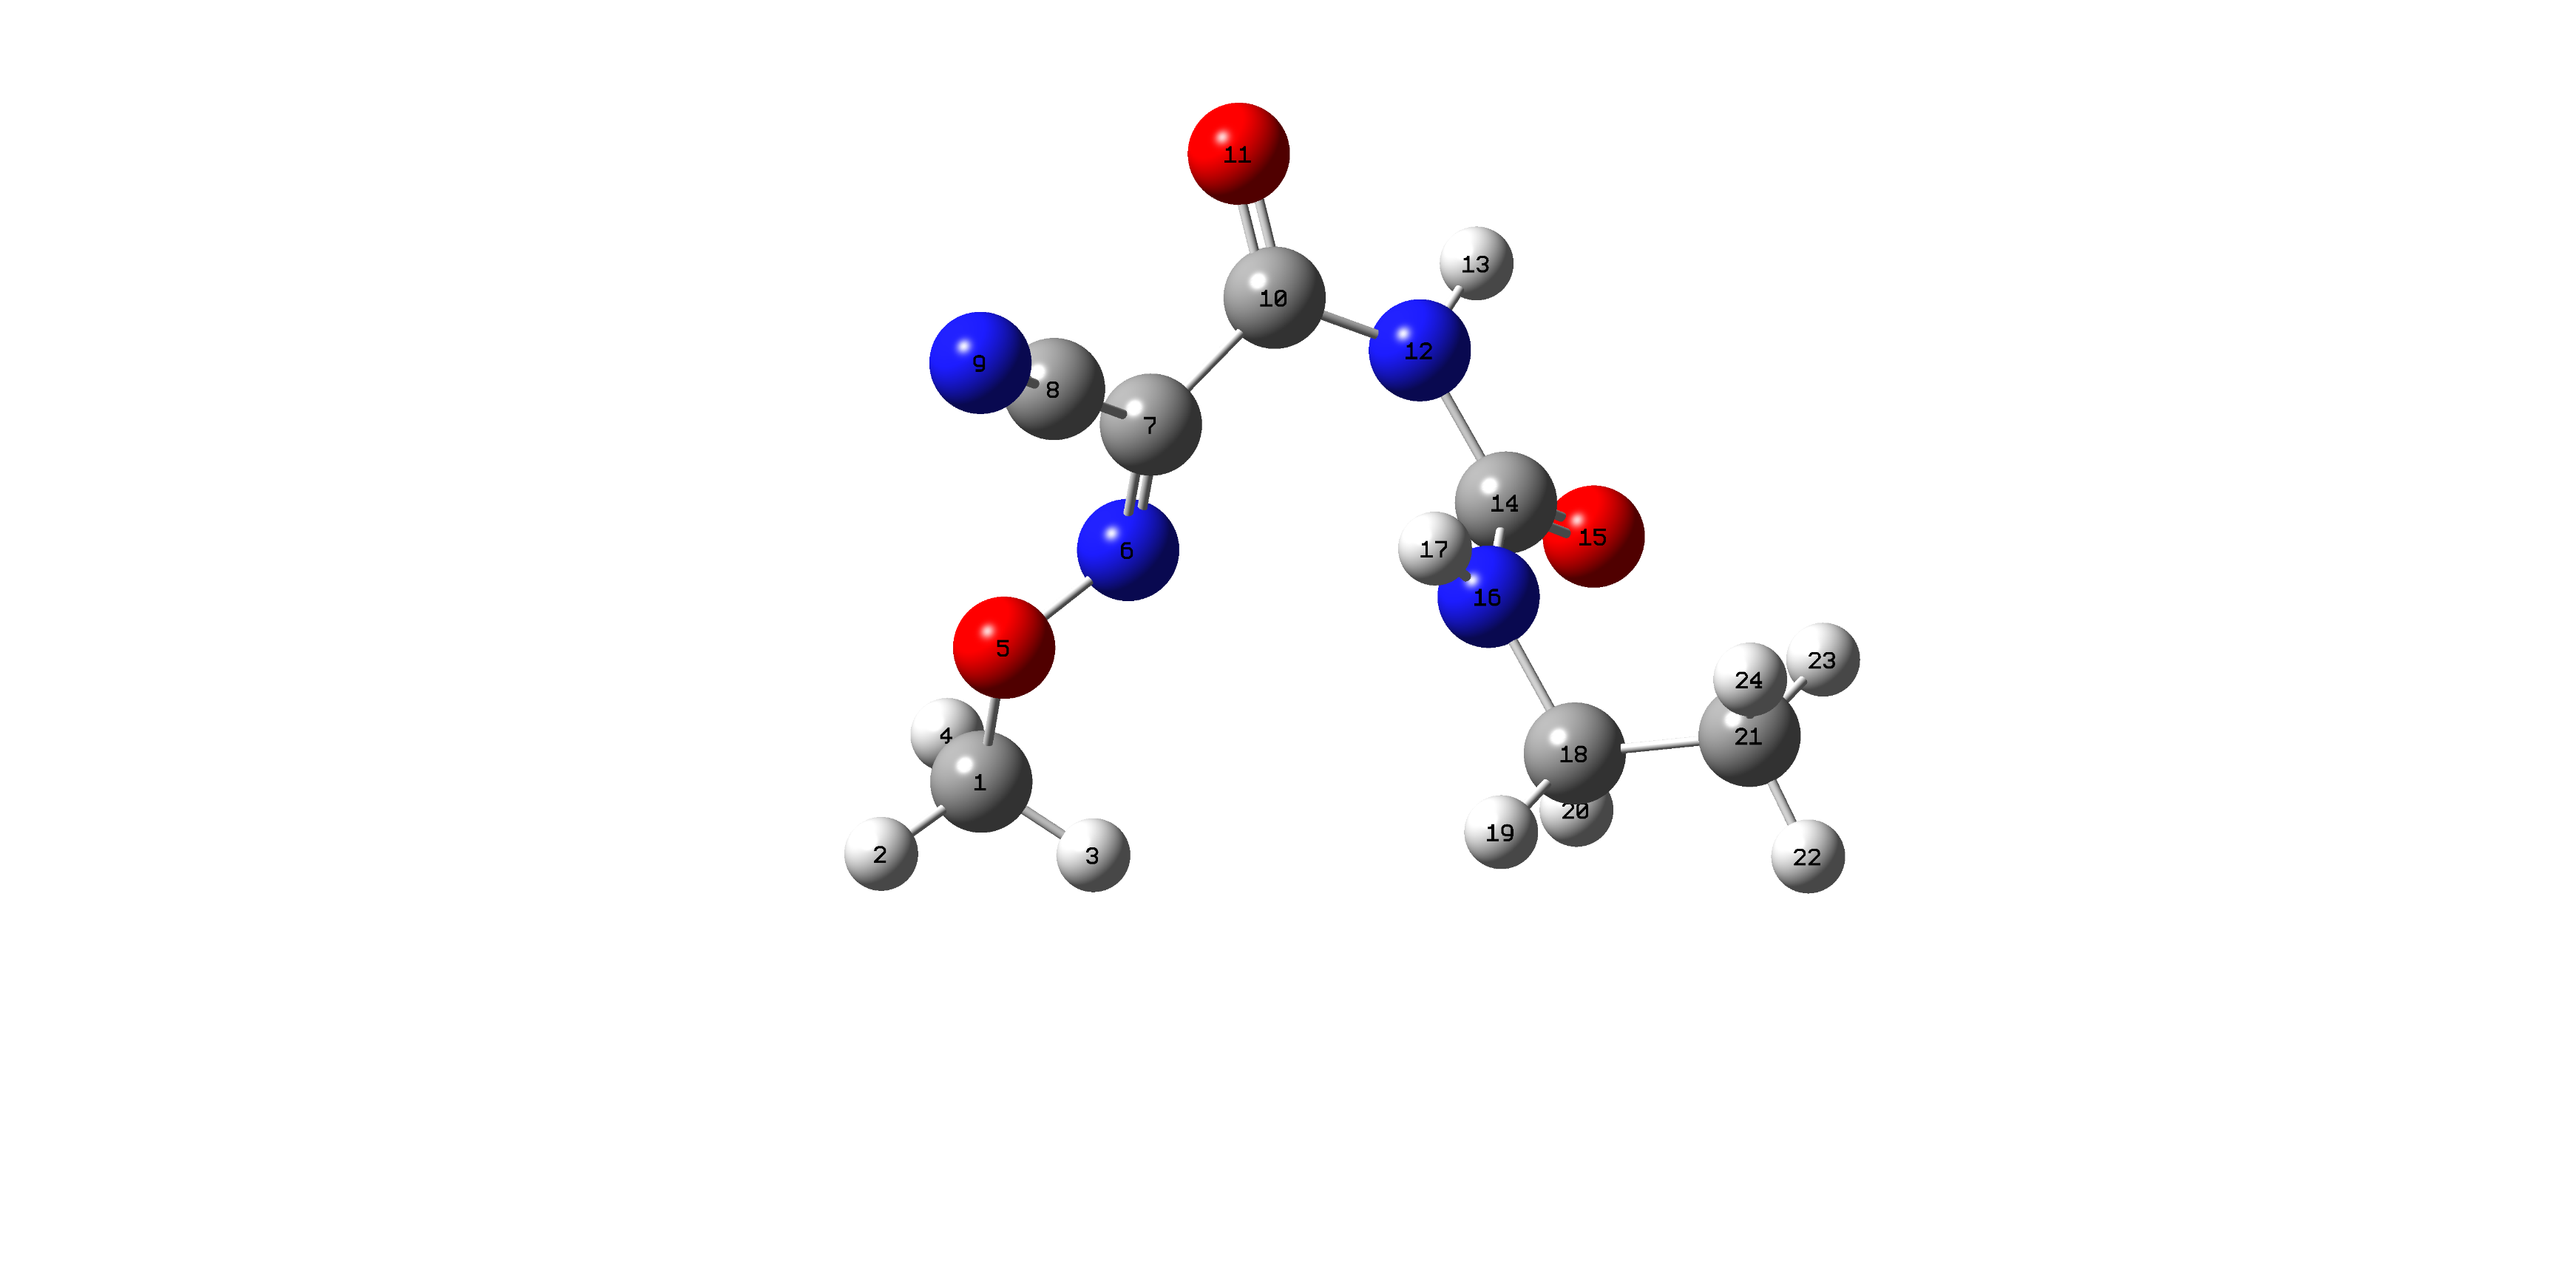


**Table 2.** Calculated bond lengths and angles for cyazofamid.

| Bond | length/ Å | Angle | Angle/ o | Angle | Angle/ o |
| --- | --- | --- | --- | --- | --- |
| R(1,2) | 1.0871 | A(2,1,3) | 110.5892 | A(16,18,19) | 107.4223 |
| R(1,3) | 1.09 | A(2,1,4) | 110.448 | A(16,18,20) | 107.1392 |
| R(1,4) | 1.0899 | A(2,1,5) | 104.9925 | A(16,18,21) | 113.2633 |
| R(1,5) | 1.4319 | A(3,1,4) | 110.4479 | A(19,18,20) | 107.7365 |
| R(5,6) | 1.3432 | A(3,1,5) | 110.1569 | A(19,18,21) | 110.8386 |
| R(6,7) | 1.2769 | A(4,1,5) | 110.0806 | A(20,18,21) | 110.2096 |
| R(7,8) | 1.434 | A(1,5,6) | 110.7854 | A(18,21,22) | 110.2375 |
| R(7,10) | 1.5064 | A(5,6,7) | 113.8261 | A(18,21,23) | 110.3886 |
| R(8,9) | 1.1473 | A(6,7,8) | 123.8259 | A(18,21,24) | 111.2237 |
| R(10,11) | 1.2066 | A(6,7,10) | 117.9328 | A(22,21,23) | 108.2503 |
| R(10,12) | 1.3715 | A(8,7,10) | 117.9124 | A(22,21,24) | 108.0019 |
| R(12,13) | 1.0124 | A(7,10,11) | 118.9107 | A(23,21,24) | 108.6497 |
| R(12,14) | 1.4207 | A(7,10,12) | 118.7035 |  |  |
| R(14,15) | 1.2095 | A(11,10,12) | 122.253 |  |  |
| R(14,16) | 1.3514 | A(10,12,13) | 113.5487 |  |  |
| R(16,17) | 1.0063 | A(10,12,14) | 133.9086 |  |  |
| R(16,18) | 1.4575 | A(13,12,14) | 112.5011 |  |  |
| R(18,19) | 1.0919 | A(12,14,15) | 119.1759 |  |  |
| R(18,20) | 1.0896 | A(12,14,16) | 116.2285 |  |  |
| R(18,21) | 1.5226 | A(15,14,16) | 124.5238 |  |  |
| R(21,22) | 1.0922 | A(14,16,17) | 119.418 |  |  |
| R(21,23) | 1.0906 | A(14,16,18) | 120.9275 |  |  |
| R(21,24) | 1.0924 | A(17,16,18) | 118.4592 |  |  |

# **S2: Absolute energy values**

**Table 3**. Absolute free energy values for the hydrolysis of cyazofamid

The branching point for this process occurs at 1b.

| Stage | Free Energy[Hartrees/particle |
| --- | --- |
| X+water | -1807.024175 |
| 1a | -1807.019668 |
| TS1 | -1806.928693 |
| **Path_a** | |
| 1b | -1806.986896 |
| TS2_a | -1806.959575 |
| P1a | -1806.975227 |
| **Path_b** | |
| TS2_b | -1806.962874 |
| P1b | -1806.99416 |

**Table 4**. Absolute free energy values for the photo-initiated degradation of cyazofamid

| **Structure** | **Free Energy[Hartrees/Particle** |
| --- | --- |
| X | -1730.597638 |
| 2a | -1730.30409 |
| 2b | -1730.30409 |
| 2c+2d | -1730.575148 |
| P2 | -1731.209245 |

**Table 5.** Absolute free energy values for the hydrolysis of cymoxanil.

The branching point for this process occurs at C.

| **Structure** | **Free Energy[Hartrees/Particle]** | **Free Energy[Hartrees/Particle]** | **Structure** |
| --- | --- | --- | --- |
| cynil | -793.565416 |  |  |
| cynil+water | -793.558254 |  |  |
| TS1 | -793.445762 |  |  |
|  | **Route A** | **Route B** |  |
| C + MeOH | -793.542356 | -793.542356 | C + MeOH |
| TS2a | -793.498227 | -793.487655 | TS2b |
| D | -793.516115 | -793.567539 | E |

**Table 6.** Absolute free energy values for the photo-initiated degradation of cymoxanil.

| **Structure** | **Free Energy[Hartrees/Particle]** | **Free Energy[Hartrees/Particle]** | **Structure** |
| --- | --- | --- | --- |
| A | -794.07298 |  |  |
| A2 | -793.725541 |  |  |
| C1 | -793.72554 | -716.789439 | B1 |
| C2 | -793.866112 | -717.443219 | B2 |
| C3 | -793.298034 | -793.577046 | PB |
| PC | -793.596268 |  |  |
